# Supplementary material
Source: PubMed Central journal article supplement (PMC6901344)
Supplement: NIHMS1542965-supplement-SupplFig.pdf [file NIHMS1542965-supplement-SupplFig.pdf]

# Supplement Figure 1

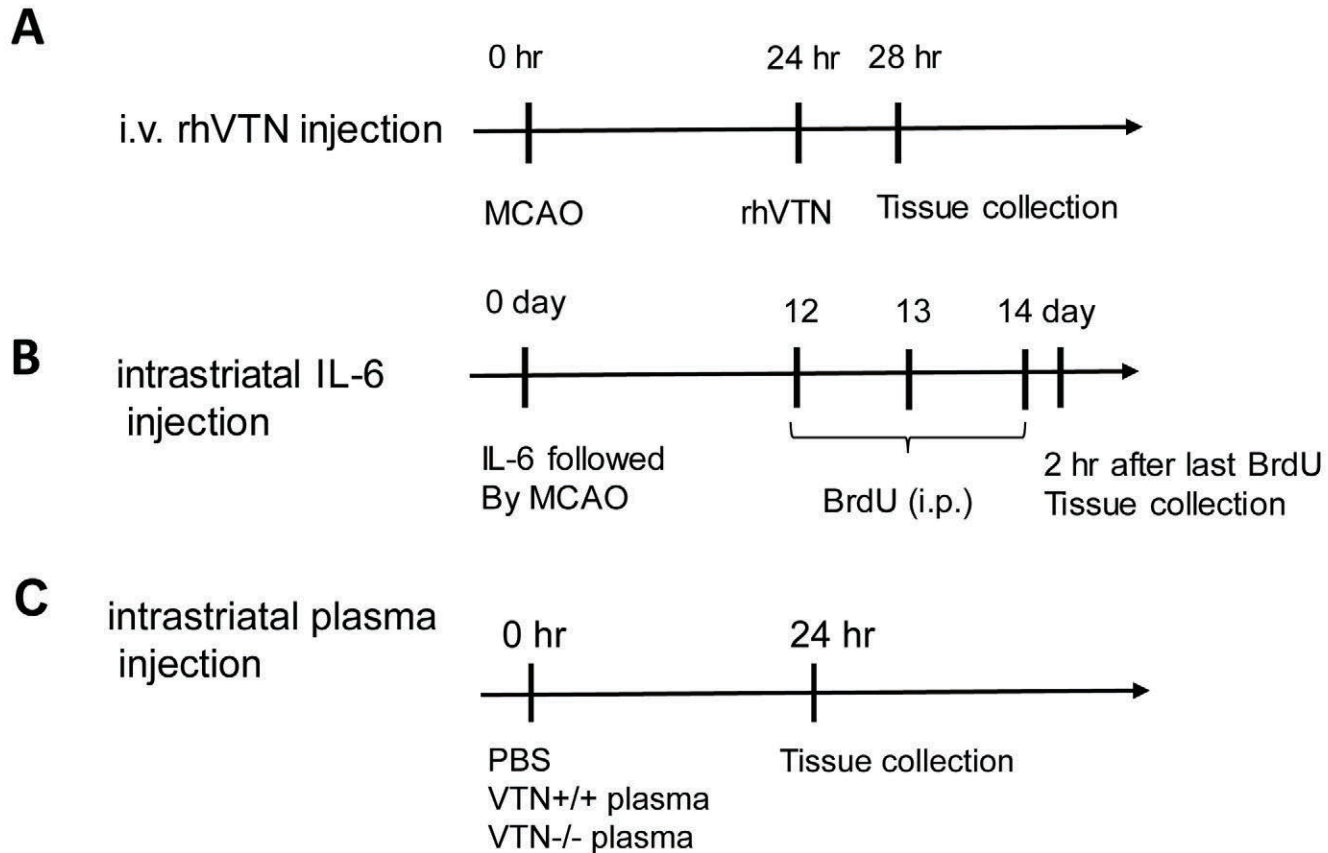

**Supplement Figure 1. The protocol used for intravenous injection of rhVTN and instriatal injection of IL-6 after or before MCAO. A)** Adult C57BL/6 or and VTN<sup>-/-</sup> mice had a 30 min MCAO. At 24 hr after MCAO, mice received intravenous injection (i.v.) via the jugular vein of 100 ul saline or 100 ul of saline with 50 ug rhVTN. 4 hr later, fresh or fixed brain tissue was collected for western blot or immunohistochemistry analysis. **B)** Both female VTN<sup>+/+</sup> and VTN<sup>-/-</sup> mice received an intrastriatal injection of PBS (1 ul) or IL-6 (100 ng in 1 ul PBS) immediately prior to a 30 min MCAO. Mice received BrdU injection at 12, 13 and 14 days after MCAO to label proliferating cells. 2 h after last BrdU, fixed brain tissue was collected to measure neurogenesis in the SVZ. **C)** Both female and male VTN<sup>+/+</sup> mice received an intrastriatal injection of PBS (1 ul), VTN<sup>+/+</sup> plasma (1 ul) or VTN<sup>-/-</sup> plasma (1 ul) and SVZ tissue was collected 24 hr later.
